# Supplementary material for: Thermogelling chitosan-based polymers for the treatment of oral mucosa ulcers
Source: Royal Society of Chemistry journal article supplement (doi:10.1039/c9bm01754b), 2019-12-26
Supplement: c9bm01754b1.pdf [file c9bm01754b1.pdf]

## **Supporting Information**

### **Thermogelling Chitosan-Based Polymers for the Treatment of Oral Mucosa Ulcers**

Zheng Luo,<sup>a</sup> Kun Xue,<sup>b</sup> Xikui Zhang,<sup>b</sup> Jason Y. C. Lim,<sup>b</sup> Xiyu Lai,<sup>a</sup> David James Young,<sup>c</sup> Zhong-Xing Zhang,<sup>\*b</sup> Yun-Long Wu<sup>\*a</sup> and Xian Jun Loh<sup>\*b, d</sup>

<sup>a</sup>Fujian Provincial Key Laboratory of Innovative Drug Target Research and State Key Laboratory of Cellular Stress Biology, School of Pharmaceutical Sciences, Xiamen University, Xiamen 361102, China

<sup>b</sup>Institute of Materials Research and Engineering, A\*STAR (Agency for Science, Technology and Research), 2 Fusionopolis Way, Innovis, #08-03, Singapore 138634, Singapore. Tel: +65 6501 1800

<sup>c</sup>College of Engineering, Information Technology and Environment, Charles Darwin University, Darwin, NT 0909, Australia

<sup>d</sup>Department of Materials Science and Engineering, National University of Singapore, Singapore 117576, Singapore

\*Corresponding Authors:

zhangzx@imre.a-star.edu.sg (Z.-X. Zhang);

wuyl@xmu.edu.cn (Y.-L. Wu);

lohxj@imre.a-star.edu.sg (X. J. Loh)

## 1. $^1\text{H}$ NMR Spectroscopy Characterization

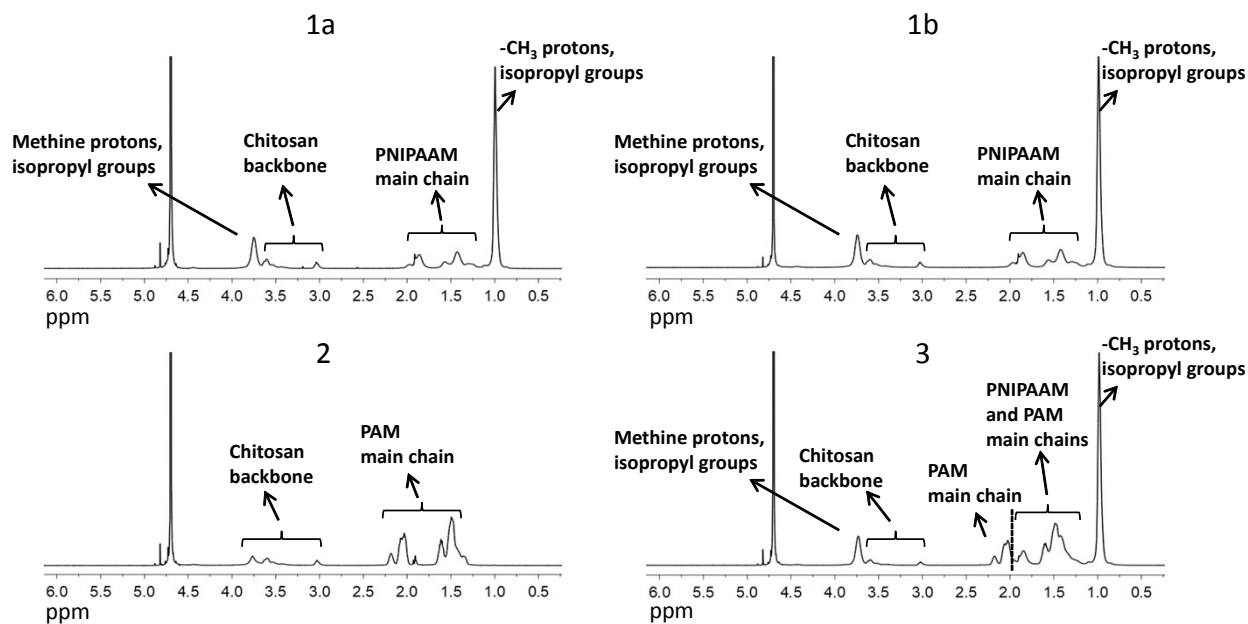

Figure S1.  $^1\text{H}$  NMR spectra of the four chitosan-based conjugates, **1a** (CS-g-PNIPAAm with less PNIPAAm), **1b** (CS-g-PNIPAAm with more PNIPAAm), **2** (CS-g-PAM) and **3** (CS-g-PNIPAAm-g-PAM), respectively in  $\text{D}_2\text{O}$  containing DCl (0.10 M) at 25  $^\circ\text{C}$  (500 MHz).

## 2. Dynamic Rheological Characterization

### 2.1 Conjugate 1a (CS-g-PNIPAAM with less PNIPAAM)

Sample solution: 5 wt% in HOAc-NaOAc buffer, 0.1 M, pH 6.0

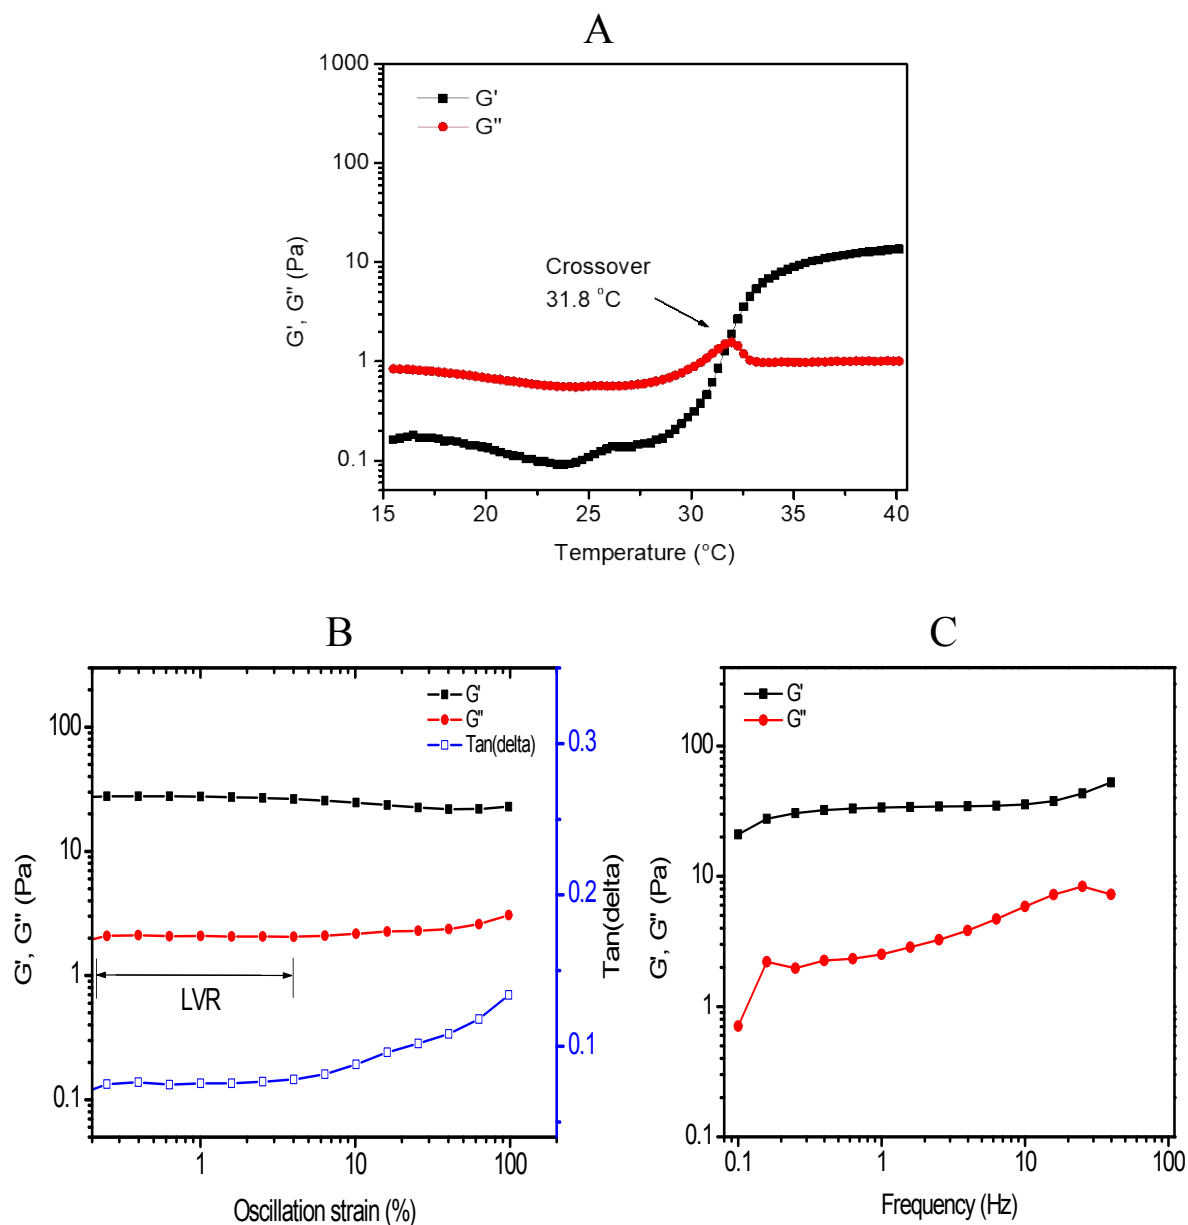

Figure S2. (A) Oscillatory temperature sweep measurement of thermogel **1a** showing the variations of  $G'$  and  $G''$  as a function of temperature between 15 and 40 °C at a constant frequency of 1 Hz and strain of 1.0 %. (B) Oscillatory strain sweep measurement of thermogel **1a** showing the variations of  $G'$ ,  $G''$  and elasticity loss factor  $\text{Tan}(\delta)$  as a function of strain amplitude between 0.2 % and 200 % under 37 °C at a constant frequency of 1 Hz. (C) Oscillatory frequency sweep measurement of thermogel **1a** showing the variations of  $G'$  and  $G''$  as a function of frequency between 0.1 Hz and 100 Hz under 37 °C at a constant strain of 1 %.

## 2.2 Conjugate **1b** (CS-*g*-PNIPAAM with more PNIPAAM)

Sample solution: 5 wt% in HOAc-NaOAc buffer, 0.1 M, pH 6.0

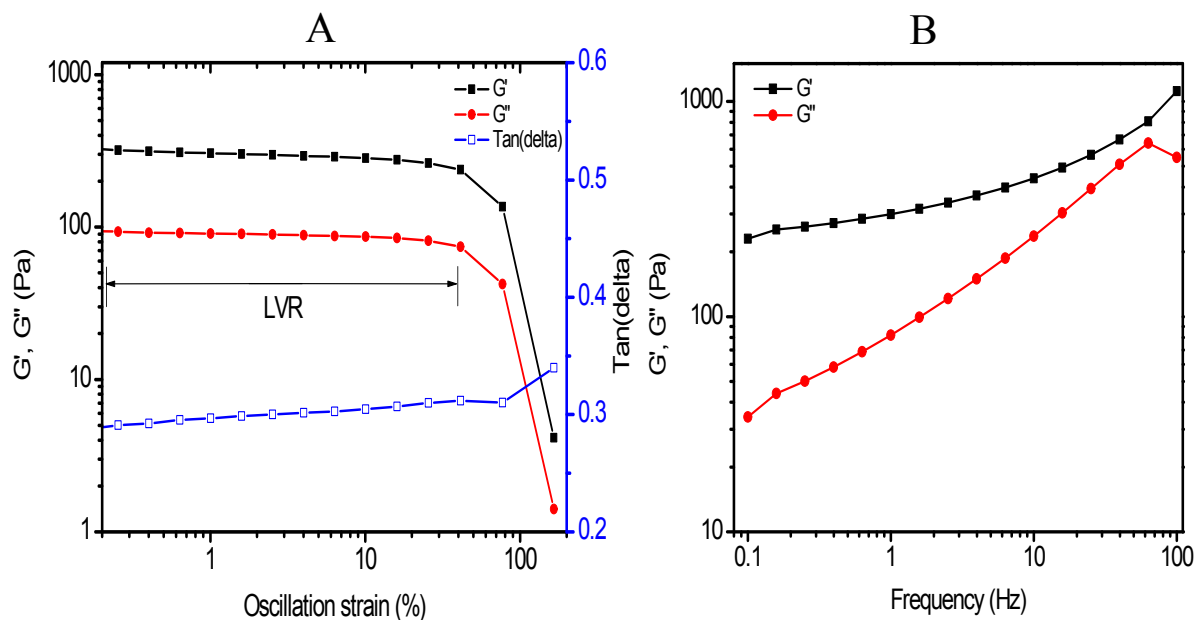

Figure S3. (A) Oscillatory strain sweep measurement of thermogel **1b** showing the variations of  $G'$ ,  $G''$  and elasticity loss factor Tan(delta) as a function of strain amplitude between 0.2 % and 200 % under 37 °C at a constant frequency of 1 Hz. (B) Oscillatory frequency sweep measurement of thermogel **1b** showing the variations of  $G'$  and  $G''$  as a function of frequency between 0.1 Hz and 100 Hz under 37 °C at a constant strain of 1 %.

### 2.3 Conjugate 2 (CS-g-PAM)

Sample solution: 5 wt% in HOAc-NaOAc buffer, 0.1 M, pH 6.0

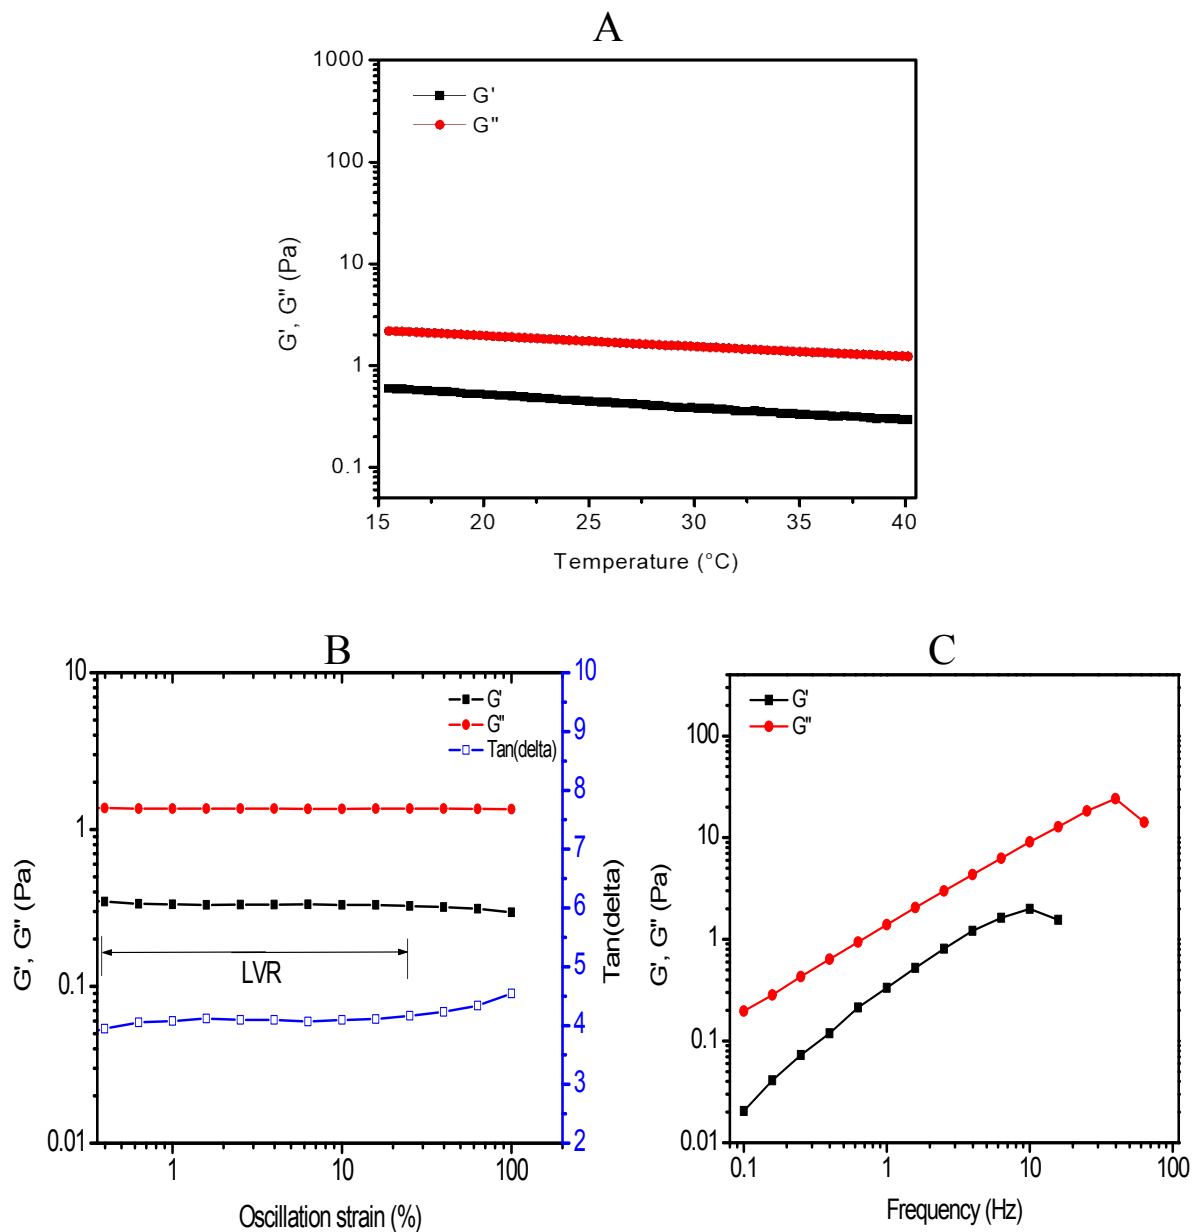

Figure S4. (A) Oscillatory temperature sweep measurement of conjugate 2 showing the variations of  $G'$  and  $G''$  as a function of temperature between 15 and 40 °C at a constant frequency of 1 Hz and strain of 1.0 %. (B) Oscillatory strain sweep measurement of conjugate 2 showing the variations of  $G'$ ,  $G''$  and elasticity loss factor  $\tan(\delta)$  as a function of strain amplitude between 0.2 % and 200 % under 37 °C at a constant frequency of 1 Hz. (C) Oscillatory frequency sweep measurement of conjugate 2 showing the variations of  $G'$  and  $G''$  as a function of frequency between 0.1 Hz and 100 Hz under 37 °C at a constant strain of 1 %.

## 2.4 Conjugate 3 (CS-g-PNIPAAM-g-PAM)

Sample solution: 5 wt% in HOAc-NaOAc buffer, 0.1 M, pH 6.0

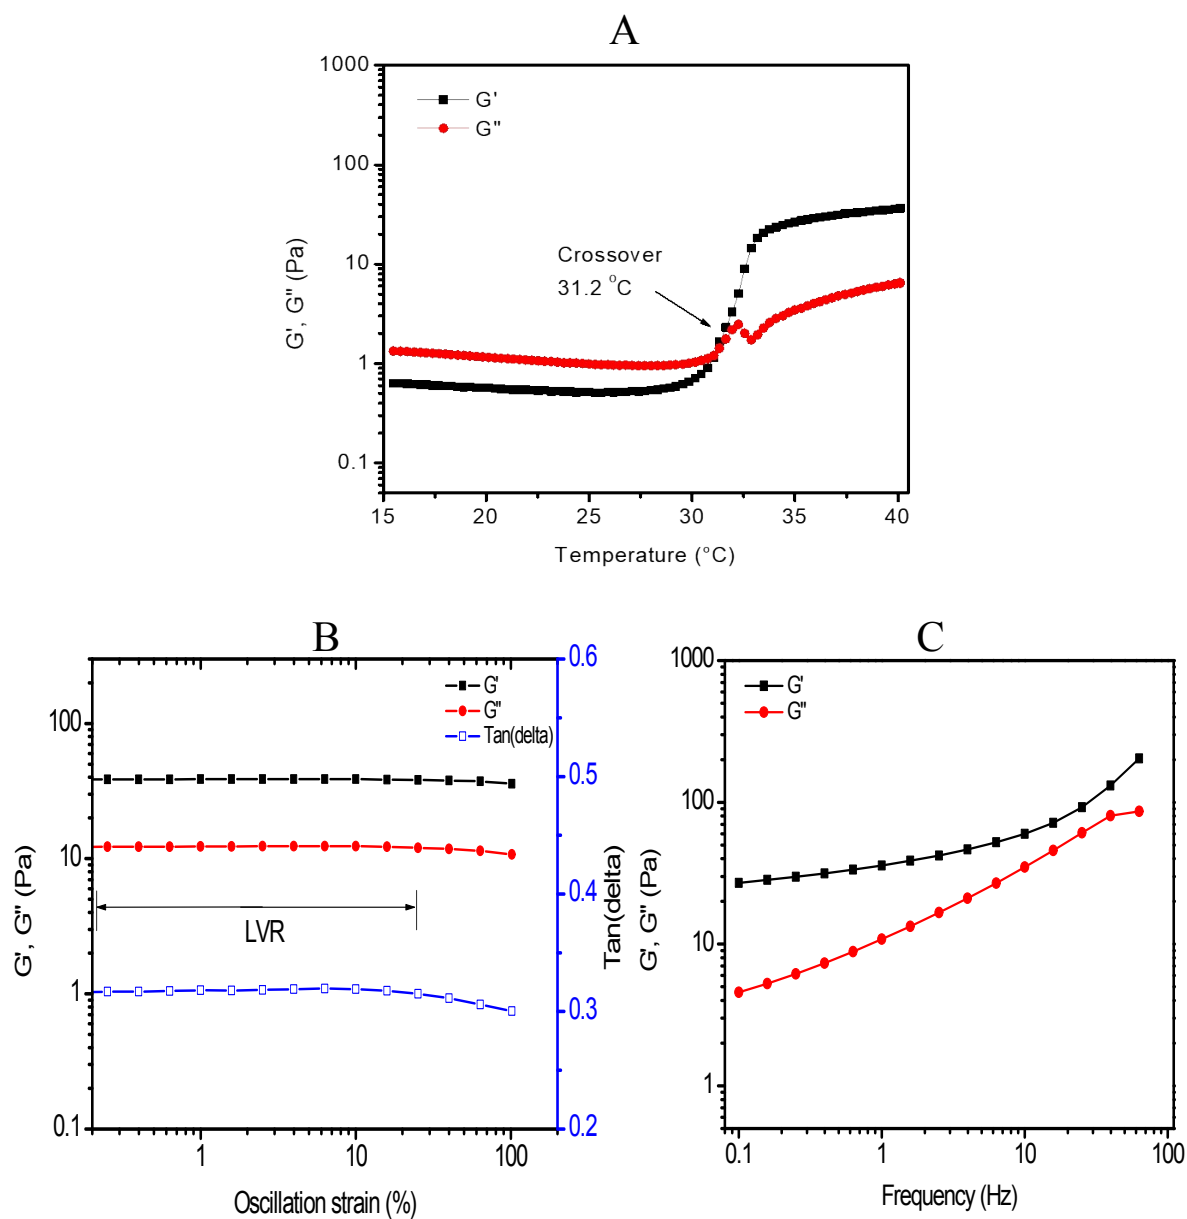

Figure S5. (A) Oscillatory temperature sweep measurement of thermogel **3** showing the variations of  $G'$  and  $G''$  as a function of temperature between 15 and 40 °C at a constant frequency of 1 Hz and strain of 1.0 %. (B) Oscillatory strain sweep measurement of thermogel **3** showing the variations of  $G'$ ,  $G''$  and elasticity loss factor  $\text{Tan}(\delta)$  as a function of strain amplitude between 0.2 % and 200 % under 37 °C at a constant frequency of 1 Hz. (C) Oscillatory frequency sweep measurement of thermogel **3** showing the variations of  $G'$  and  $G''$  as a function of frequency between 0.1 Hz and 100 Hz under 37 °C at a constant strain of 1 %.

### 3. Antibacterial Activity

**a.**

**Escherichia Coli**

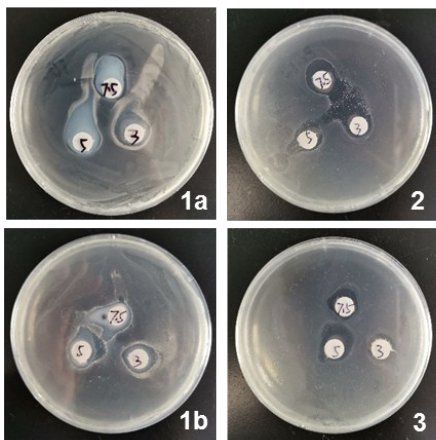

**b.**

**Staphylococcus Aureus**

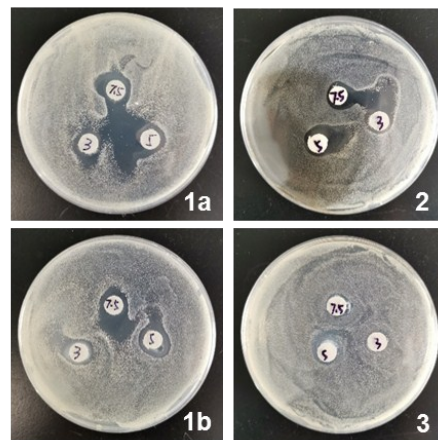

Figure S6. Plate antibacterial maps against *Escherichia coli* (a) and *Staphylococcus aureus* (b) at different thermogel concentrations after 16 h.
